# Supplementary material for: Association Between miR-30a/SNAI1 Gene Polymorphisms and the Risk of Diabetic Kidney Disease
Source: Research Square preprint supplement (doi:10.21203/rs.3.rs-127615/v1), 2020-12-23

**Association between miR-30a/SNAI1 gene polymorphisms and the risk of diabetic kidney disease**

Cailian Yang1,2, Tao Tong1,3, Mingfang Sun1,4, Bo Zhou1,5.

1.Department of Endocrinology, the First Affiliated Hospital of Chongqing Medical University,Chongqing,400000,China. [2.1808622838@qq.com;](mailto:2.1808622838@qq.com;) [3.tong_tong123@163.com;](mailto:3.tong_tong123@163.com;) [4.189659280@qq.com;](mailto:4.189659280@qq.com;) [5.zhoubo915@126.com](mailto:5.zhoubo915@126.com)

**supplementary information**

1.miR-30a RS2222722 CC genotype


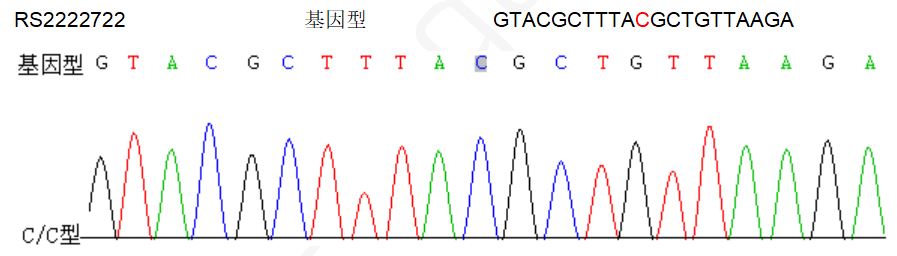


2.miR-30a RS2222722 CT genotype


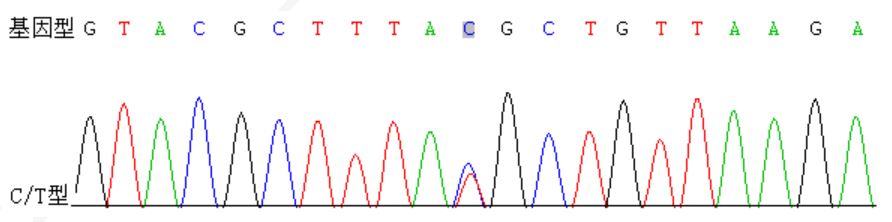


3.miR-30a RS2222722 TT genotype


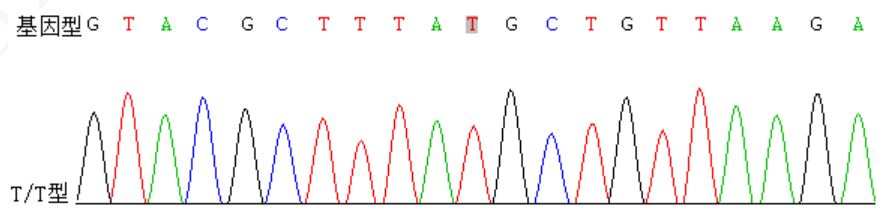


4.SNAI1 RS1543442 AA genotype


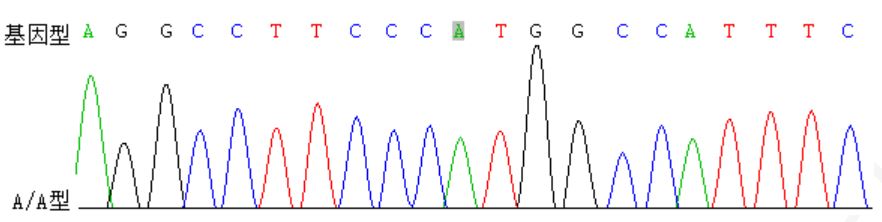


5.SNAI1 RS1543442 AG genotype


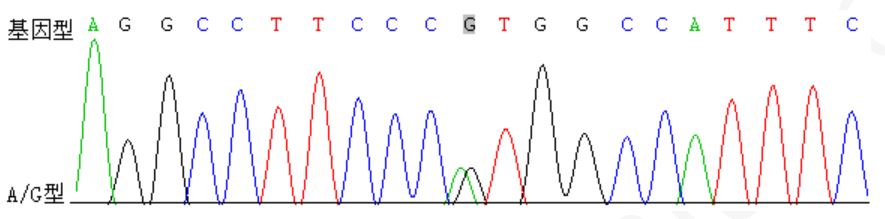


6.SNAI1 RS1543442 GG genotype


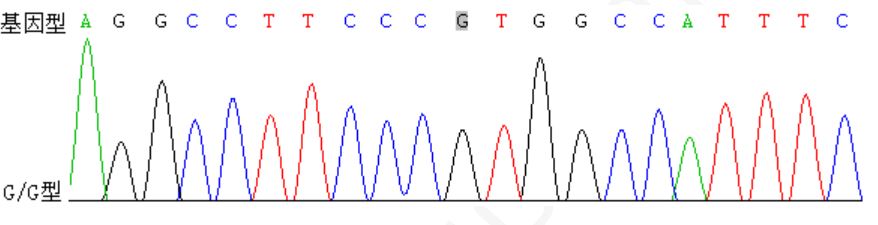


7.Electrophoresis results of PCR products


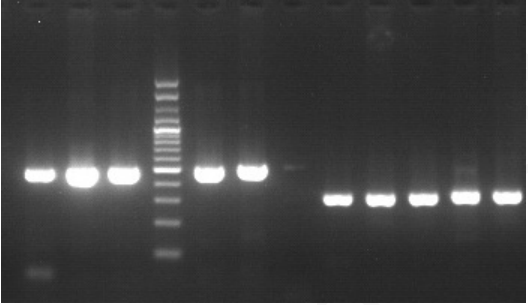

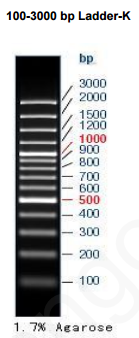


8.Electrophoresis results of DNA


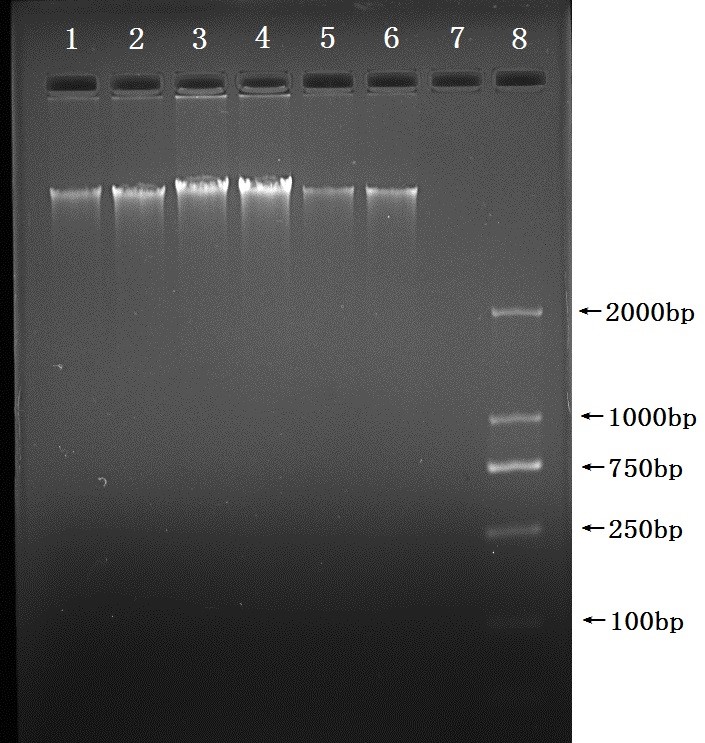

Supplement: Supplementary file 1 [file a725b0ab95484e49116c9957.docx]
